# Supplementary material for: Subtle structural variation in copper metal-organic frameworks: syntheses, structures, magnetic properties and catalytic behaviour
Source: Royal Society of Chemistry journal article supplement (doi:10.1039/b807063f), 2008-01-01
Supplement: b807063f.pdf [file b807063f.pdf]

## Subtle structural variation in copper metal-organic frameworks: syntheses, structures, magnetic properties and catalytic behaviour

Andrew D. Burrows, Christopher G. Frost, Mary F. Mahon, Melanie Winsper,  
Christopher Richardson, J. Paul Attfield and Jennifer A. Rodgers

### Supplementary Information

IR Spectrum of  $\{[\text{Cu}_2(5\text{-nbdc})_2(\text{DMF})_2] \cdot 2\text{DMF}\}_\infty$  (**1**)

TGA of  $\{[\text{Cu}_2(5\text{-nbdc})_2(\text{DMF})_2] \cdot 2\text{DMF}\}_\infty$  (**1**)

XRPD of  $\{[\text{Cu}_2(5\text{-nbdc})_2(\text{DMF})_2] \cdot 2\text{DMF}\}_\infty$  (**1**)

IR Spectrum of  $\{[\text{Cu}_2(5\text{-nbdc})_3(\text{DMF})_2] \cdot 3\frac{1}{3}\text{DMF}\}_\infty$  (**2**)

TGA of  $\{[\text{Cu}_2(5\text{-nbdc})_2(\text{DMF})_2] \cdot 3\frac{1}{3}\text{DMF}\}_\infty$  (**2**)

Magnetic data for  $\{[\text{Cu}_2(5\text{-nbdc})_2(\text{DMF})_2] \cdot 3\frac{1}{3}\text{DMF}\}_\infty$  (**2**)

XRPD of  $\{[\text{Cu}_2(5\text{-nbdc})_2(\text{DMF})_2] \cdot 3\frac{1}{3}\text{DMF}\}_\infty$  (**2**)

IR Spectrum of  $[\text{Cu}_6(5\text{-nbdc})_6(\text{DMF})_6(\text{H}_2\text{O})_{12}] \cdot 57\text{H}_2\text{O}$  (**3**)

TGA of  $[\text{Cu}_6(5\text{-nbdc})_6(\text{DMF})_6(\text{H}_2\text{O})_{12}] \cdot 57\text{H}_2\text{O}$  (**3**)

IR Spectrum of  $\{[\text{Cu}_2(5\text{-msbdc})_2(\text{OH}_2)_2] \cdot 3\text{DMF}\}_\infty$  (**4**)

TGA of  $\{[\text{Cu}_2(5\text{-msbdc})_2(\text{OH}_2)_2] \cdot 3\text{DMF}\}_\infty$  (**4**)

Magnetic data for  $\{[\text{Cu}_2(5\text{-msbdc})_2(\text{OH}_2)_2] \cdot 3\text{DMF}\}_\infty$  (**4**)

XRPD of  $\{[\text{Cu}_2(5\text{-msbdc})_2(\text{OH}_2)_2] \cdot 3\text{DMF}\}_\infty$  (**4**)

IR Spectrum of  $[\text{Cu}_2(5\text{-abdc})_2 \cdot (\text{DMF})_2]_\infty$  (**5**)

TGA of  $[\text{Cu}_2(5\text{-abdc})_2 \cdot (\text{DMF})_2]_\infty$  (**5**)

XRPD of  $[\text{Cu}_2(5\text{-abdc})_2 \cdot (\text{DMF})_2]_\infty$  (**5**)

IR Spectrum of  $[\text{Cu}_2(2\text{-mbdc})_2(\text{DMF})_2]_\infty$  (**6**)

TGA of  $[\text{Cu}_2(2\text{-mbdc})_2(\text{DMF})_2]_\infty$  (**6**)

XRPD of  $[\text{Cu}_2(2\text{-mbdc})_2(\text{DMF})_2]_\infty$  (**6**)

IR Spectrum of  $\{[\text{Cu}_2(5\text{-nbdc})_2(\text{DMF})_2] \cdot 2\text{DMF}\}_\infty$  (**1**)

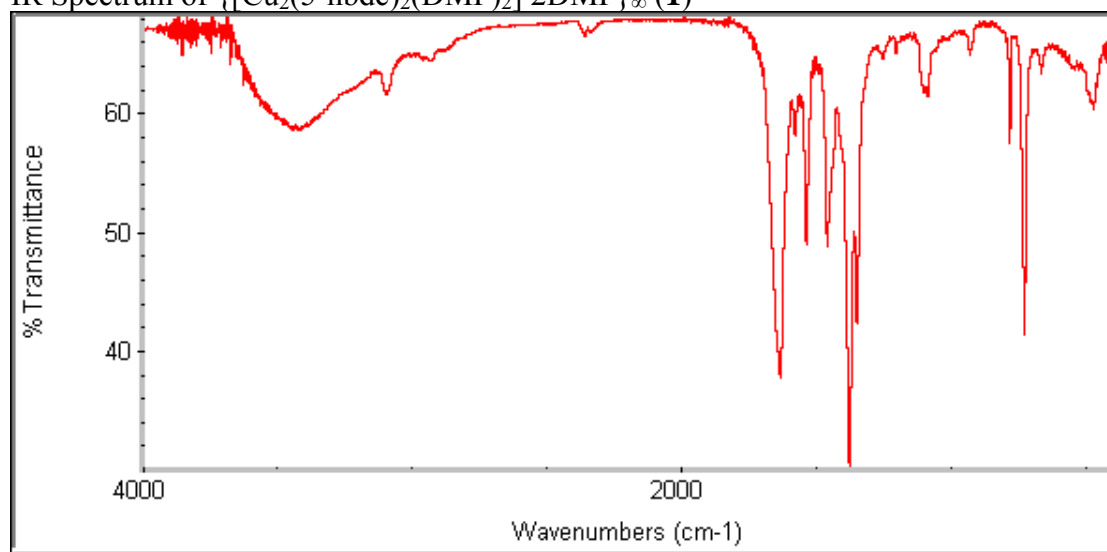

TGA of  $\{[\text{Cu}_2(5\text{-nbdc})_2(\text{DMF})_2] \cdot 2\text{DMF}\}_\infty$  (**1**)

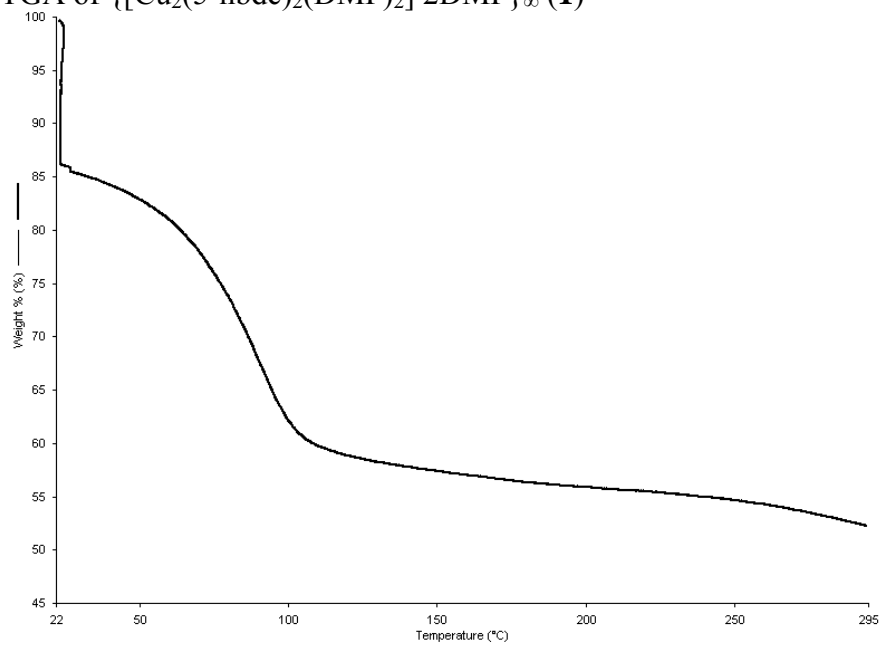

XRPD of  $\{[\text{Cu}_2(5\text{-nbdc})_2(\text{DMF})_2] \cdot 2\text{DMF}\}_\infty$  (**1**)

H06ADB2 & CR2-130

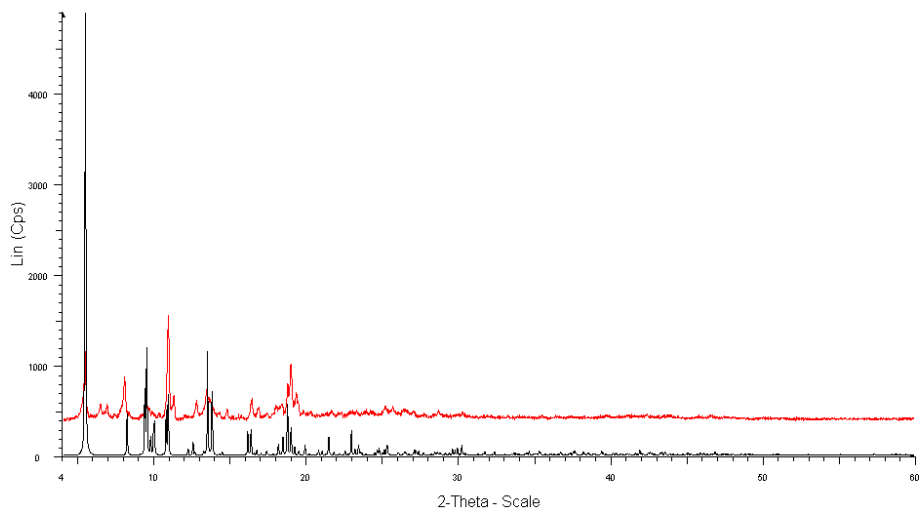

(red experimental, black calculated from X-ray single crystal structure)

IR Spectrum of  $\{[\text{Cu}_2(5\text{-nbdc})_3(\text{DMF})_2] \cdot 3\frac{1}{3}\text{DMF}\}_\infty$  (2)

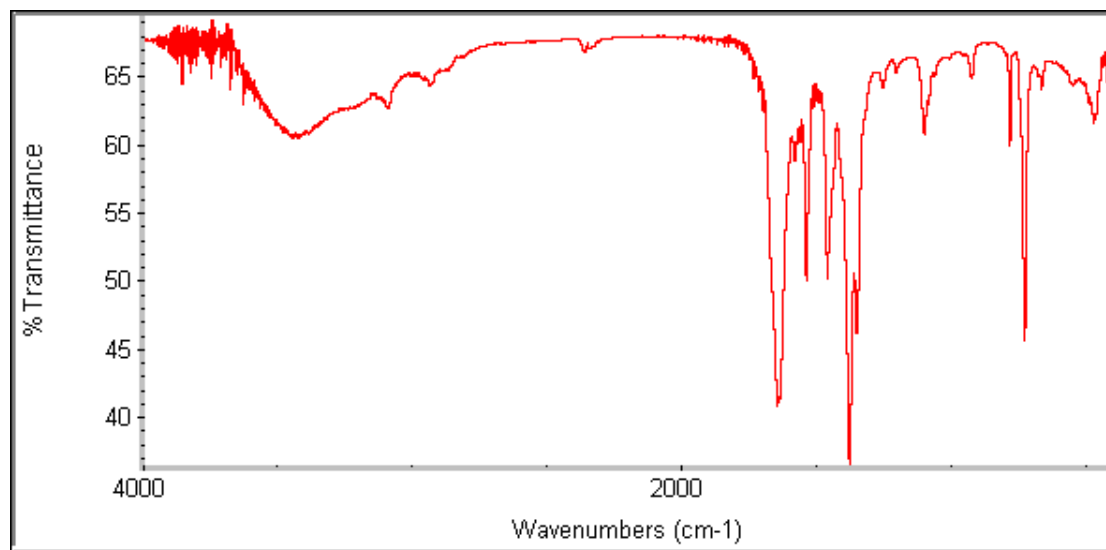

TGA of  $\{[\text{Cu}_2(5\text{-nbdc})_2(\text{DMF})_2] \cdot 3\frac{1}{3}\text{DMF}\}_\infty$  (2)

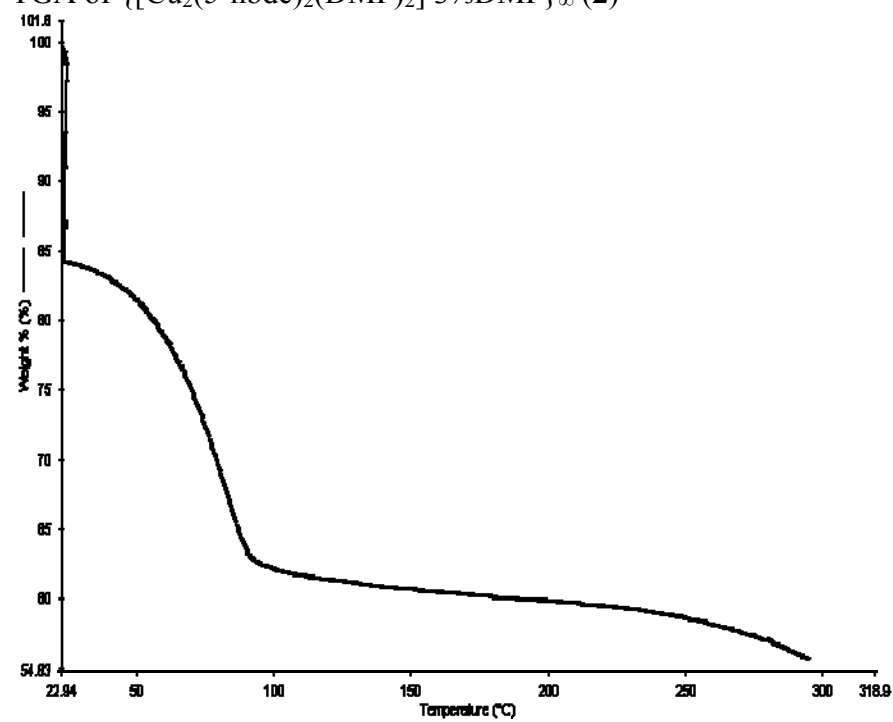

Magnetic data for  $\{[\text{Cu}_2(5\text{-nbdc})_2(\text{DMF})_2] \cdot 3\frac{1}{3}\text{DMF}\}_\infty$  (**2**)

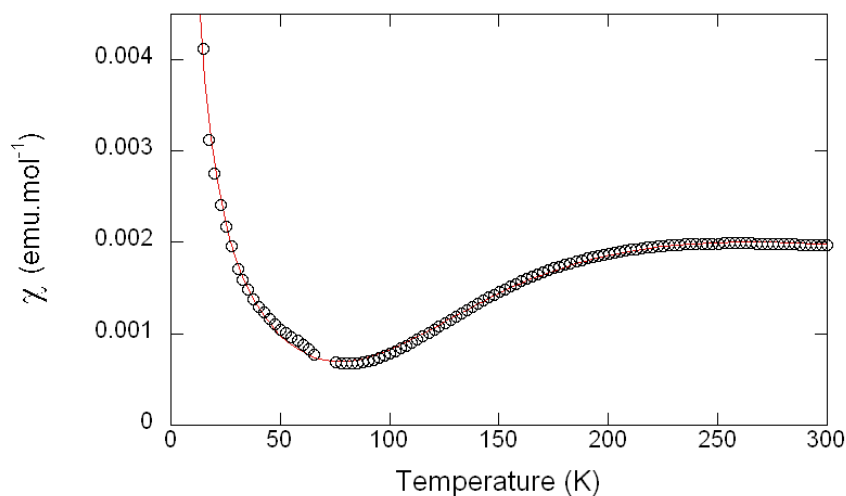

(the black circles are the experimental data, the red line shows the fit of the Bleaney-Bowers expression with a Curie contribution)

XRPD of  $\{[\text{Cu}_2(5\text{-nbdc})_2(\text{DMF})_2] \cdot 3\frac{1}{3}\text{DMF}\}_\infty$  (**2**)

h06adb1 & cr2-026

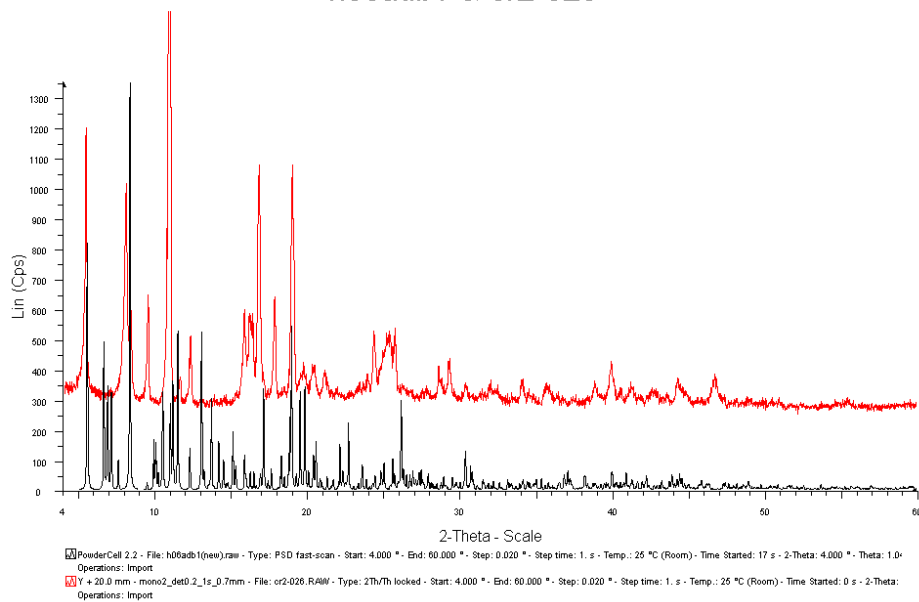

(red experimental, black calculated from X-ray single crystal structure)

IR Spectrum of  $[\text{Cu}_6(5\text{-nbdc})_6(\text{DMF})_6(\text{H}_2\text{O})_{12}] \cdot 57\text{H}_2\text{O}$  (**3**)

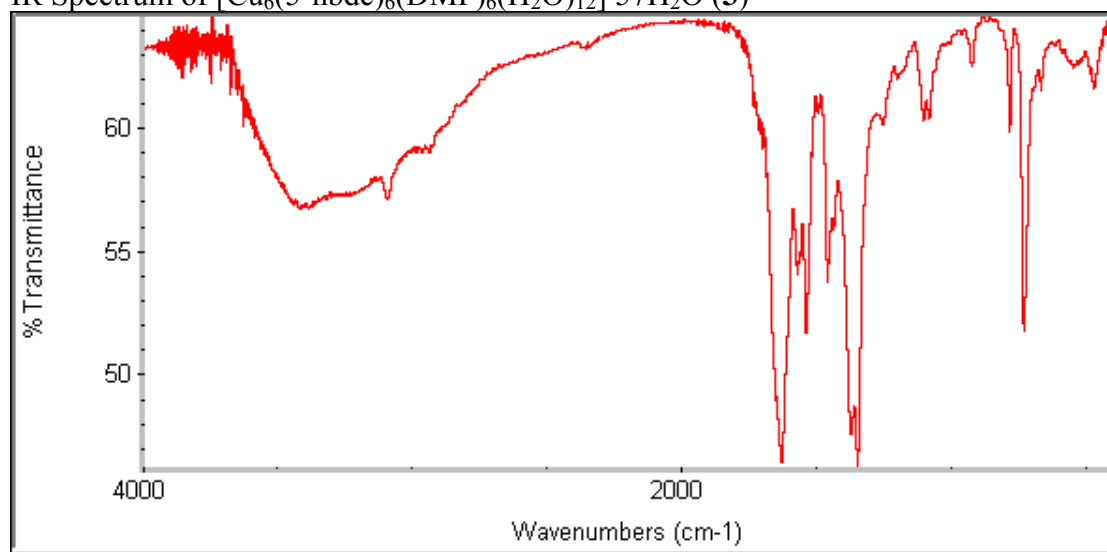

TGA of  $[\text{Cu}_6(5\text{-nbdc})_6(\text{DMF})_6(\text{H}_2\text{O})_{12}] \cdot 57\text{H}_2\text{O}$  (**3**)

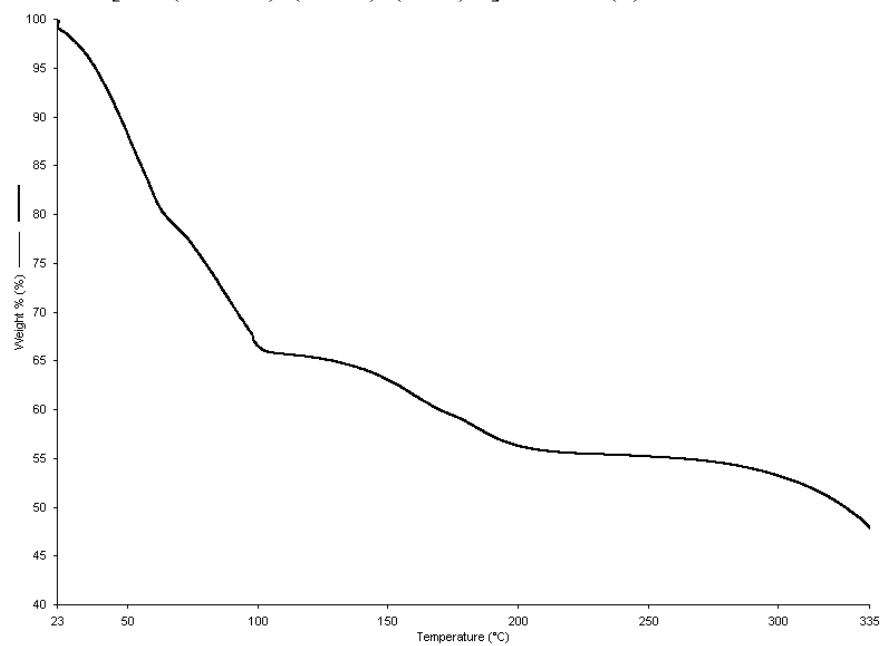

IR Spectrum of  $\{[\text{Cu}_2(5\text{-msbdc})_2(\text{OH}_2)_2]\cdot 3\text{DMF}\}_\infty$  (**4**)

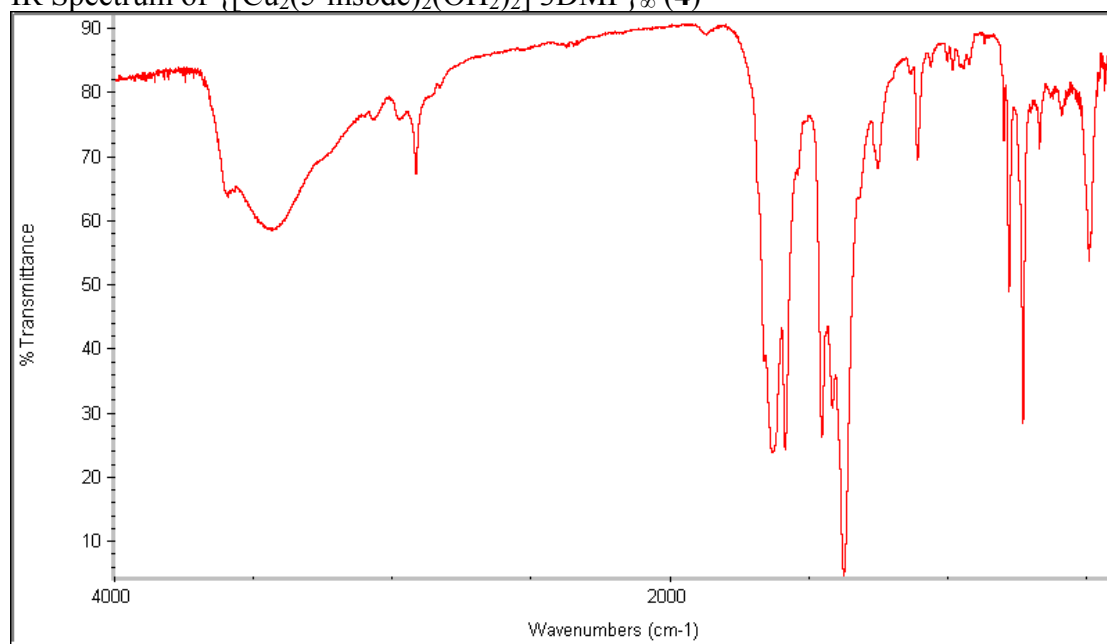

TGA of  $\{[\text{Cu}_2(5\text{-msbdc})_2(\text{OH}_2)_2]\cdot 3\text{DMF}\}_\infty$  (**4**)

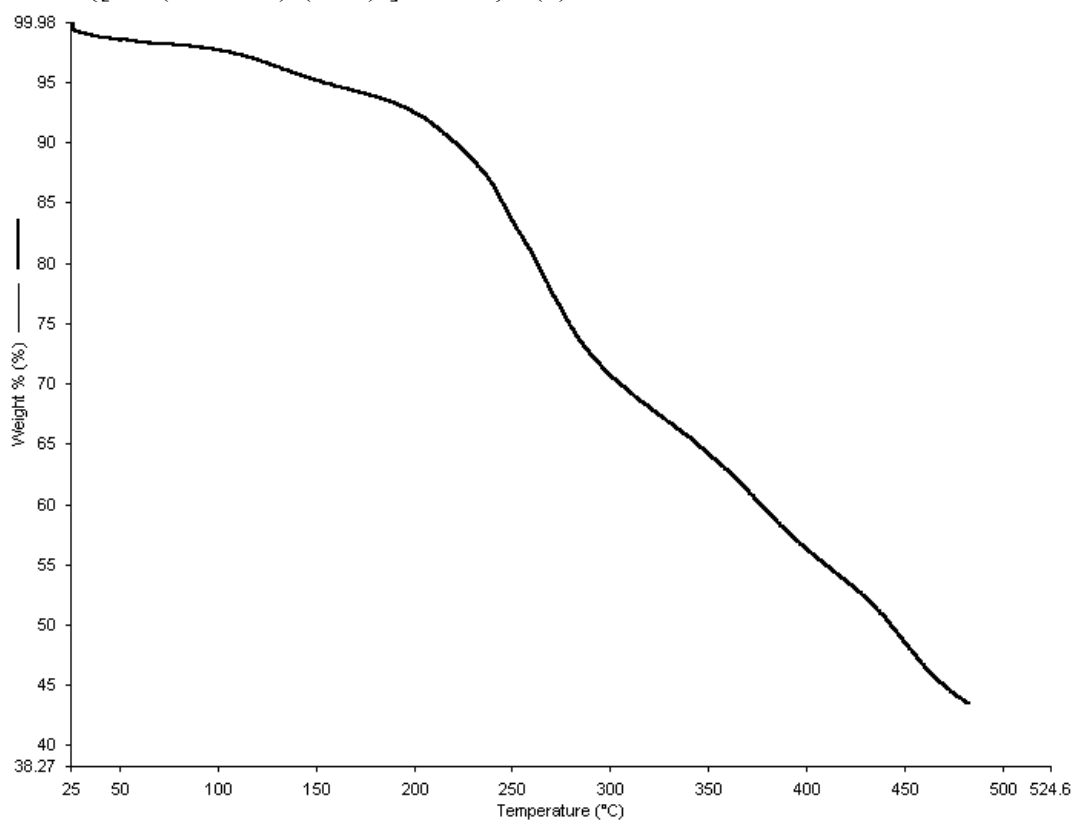

Magnetic data for  $\{[\text{Cu}_2(5\text{-msbdc})_2(\text{OH}_2)_2]\cdot 3\text{DMF}\}_\infty$  (**4**)

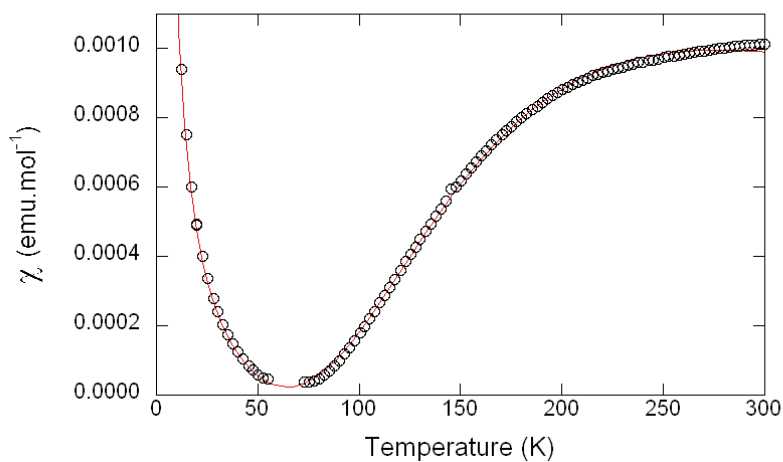

(the black circles are the experimental data, the red line shows the fit of the Bleaney-Bowers expression with a Curie contribution)

XRPD of  $\{[\text{Cu}_2(5\text{-msbdc})_2(\text{OH}_2)_2]\cdot 3\text{DMF}\}_\infty$  (**4**)

h06adb8 & cr2-104

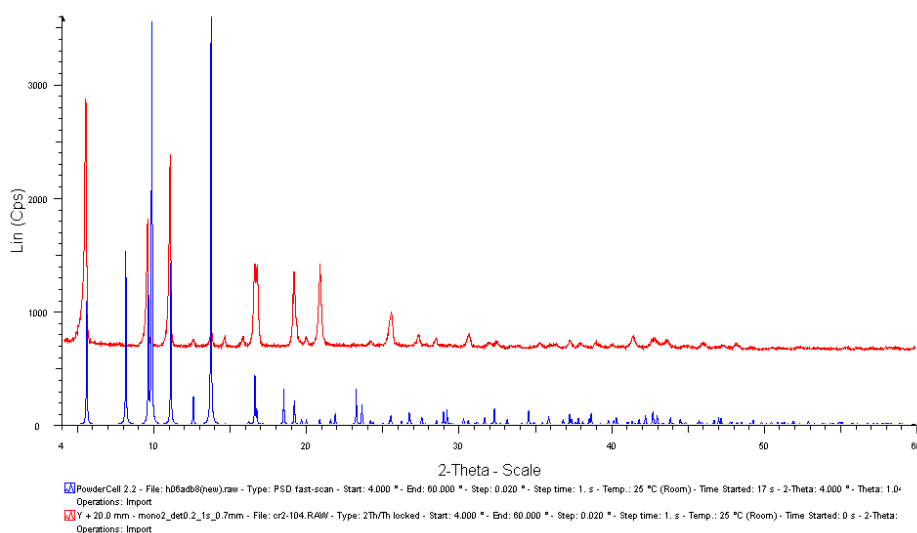

(red experimental, blue calculated from X-ray single crystal structure)



IR of  $[\text{Cu}_2(5\text{-abdc})_2(\text{DMF})_2]_\infty$  (**5**)

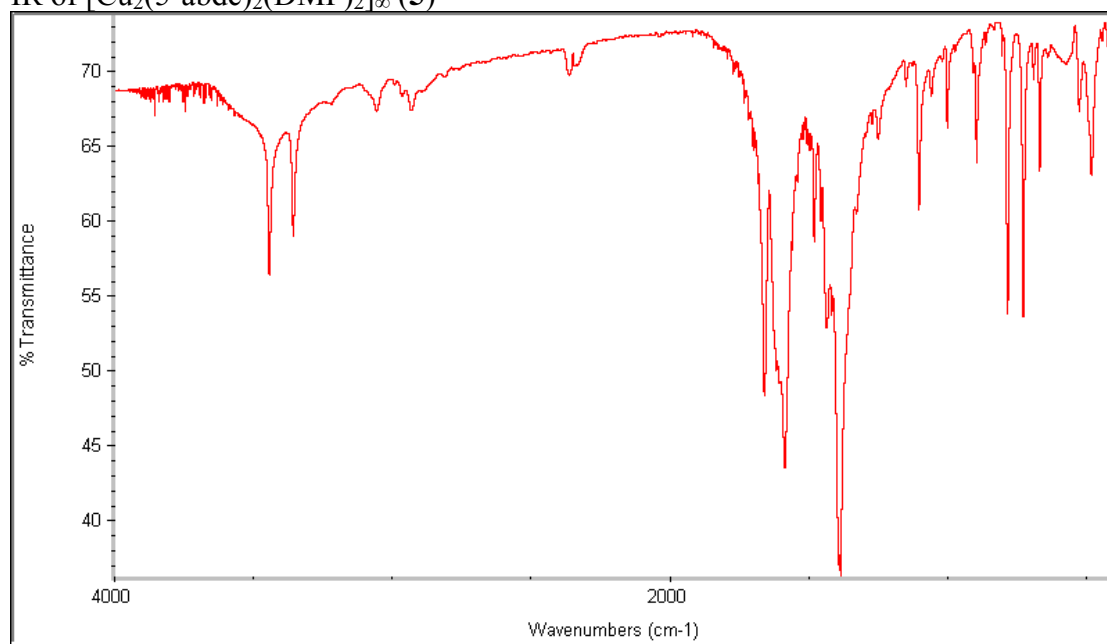

TGA of  $[\text{Cu}_2(5\text{-abdc})_2(\text{DMF})_2]_\infty$  (**5**)

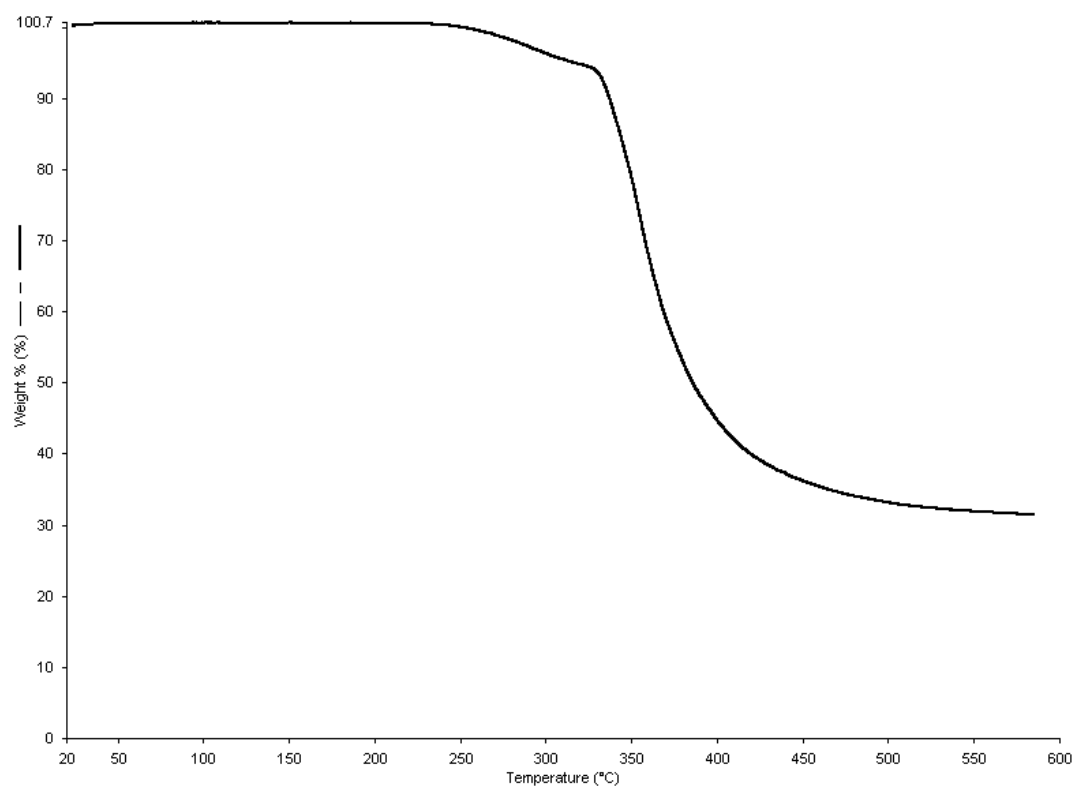

XRPD of  $[\text{Cu}_2(5\text{-abdc})_2(\text{DMF})_2]$  (**5**)

cr3-037a, cr3-038b & k07adb18(calc)

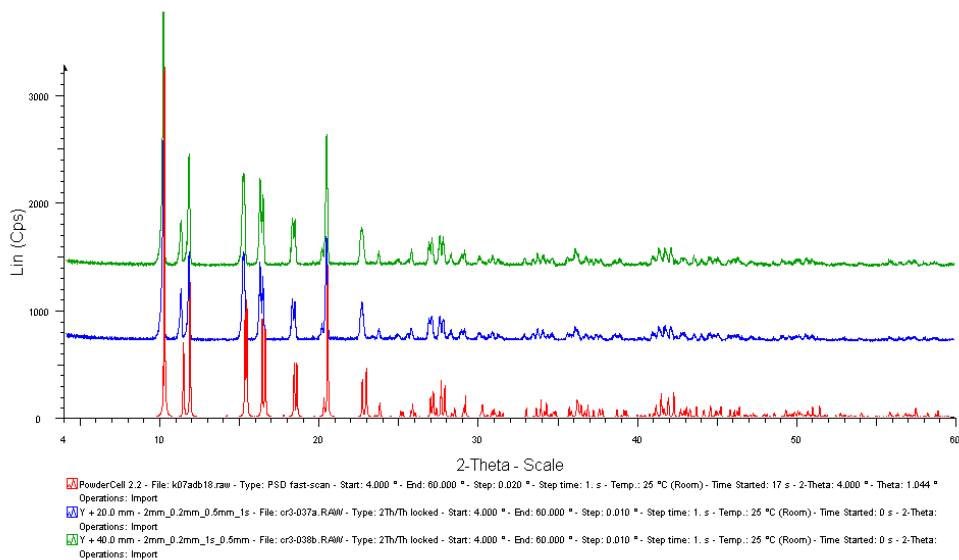

(green and blue experimental, red calculated from X-ray single crystal structure)

IR Spectrum of  $[\text{Cu}_2(2\text{-mbdc})_2(\text{DMF})_2]_\infty$  (**6**)

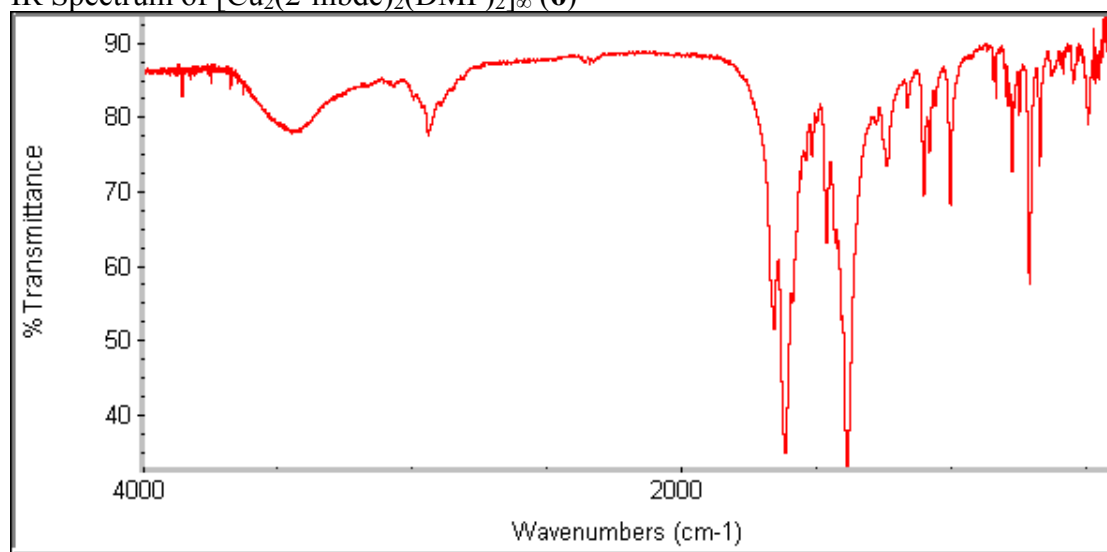

TGA of  $[\text{Cu}_2(2\text{-mbdc})_2(\text{DMF})_2]_\infty$  (**6**)

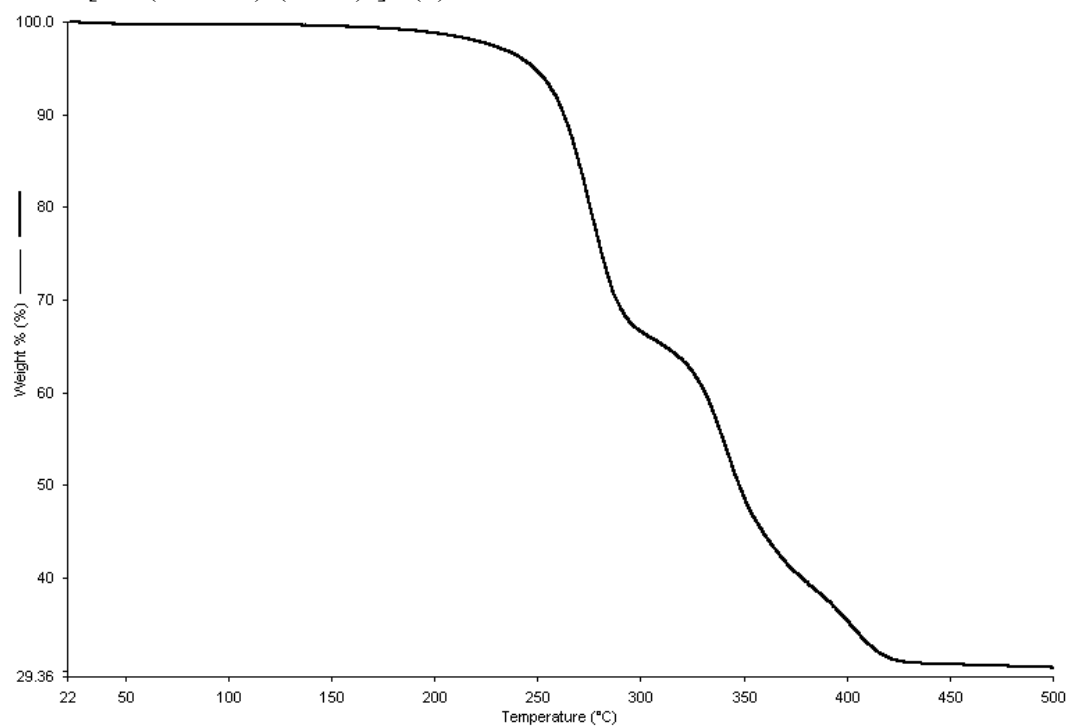

XRPD of  $[\text{Cu}_2(2\text{-mbdc})_2(\text{DMF})_2]_\infty$  (**6**)

cr2-020 & k06adb10

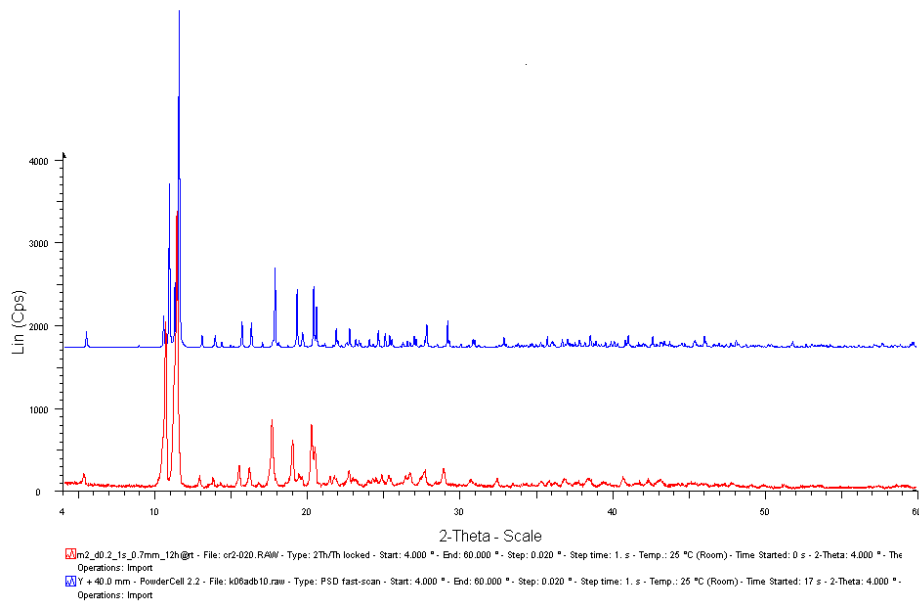

(red experimental, blue calculated from X-ray single crystal structure)
